# Supplementary material for: CO2 electroreduction towards ethylene on copper phosphate-derived catalysts in alkaline flow cell
Source: Royal Society of Chemistry journal article supplement (doi:10.1039/d4cy01365d), 2025-01-01
Supplement: d4cy01365d1.pdf [file d4cy01365d1.pdf]

## Supporting information

### CO<sub>2</sub> ELECTROREDUCTION TOWARD ETHYLENE ON COPPER PHOSPHATE-DERIVED CATALYSTS IN ALKALINE FLOW CELL

*Julien Kouadio Dangbegnon*<sup>\*a</sup>, *Marco Etzi*<sup>l</sup>, *Juqin Zeng*<sup>a,b</sup>, *Angelica Chiodoni*<sup>a</sup>, *Candido Fabrizio Pirri*<sup>a,b</sup>

<sup>a</sup>Center for Sustainable Future Technologies @Polito, Istituto Italiano di Tecnologia, Via Livorno 60,  
10144 Torino, Italy

<sup>b</sup>Applied Science and Technology Department, Politecnico di Torino, Corso Duca degli Abruzzi 24,  
10129 Torino, Italy

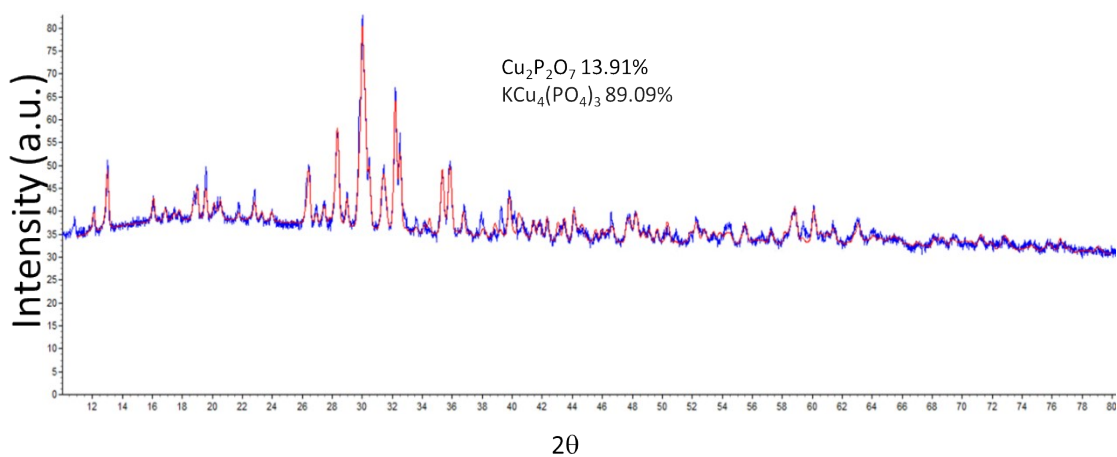

Figure S1: XRD of annealed copper phosphate.

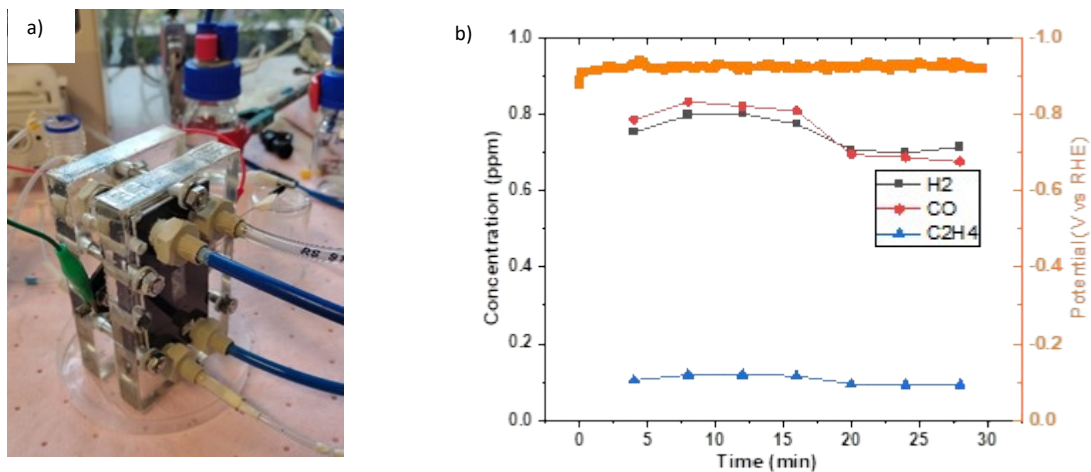

Figure S2: a) Picture of the flow cell, b) Online GC response for gas product and corresponding potential as a function of time in 1M KOH and at 150 mA cm<sup>-2</sup>.

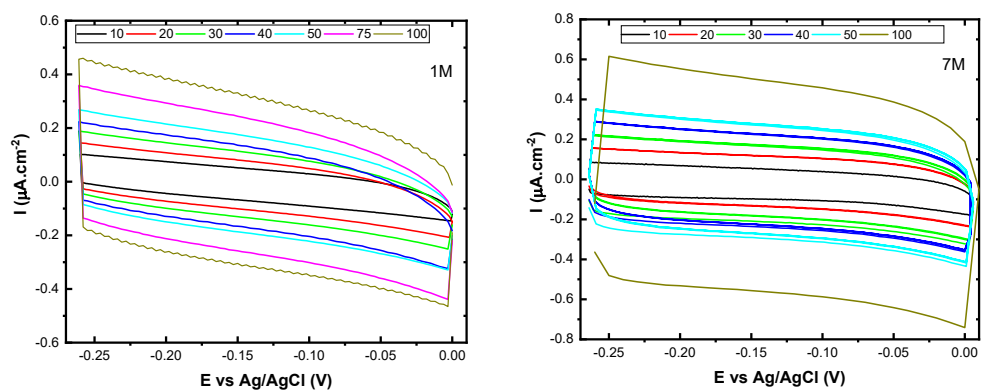

Figure S3: Electrochemical surface area (ECSA) measurements in 1M and 7M KOH for copper phosphate electrodes.

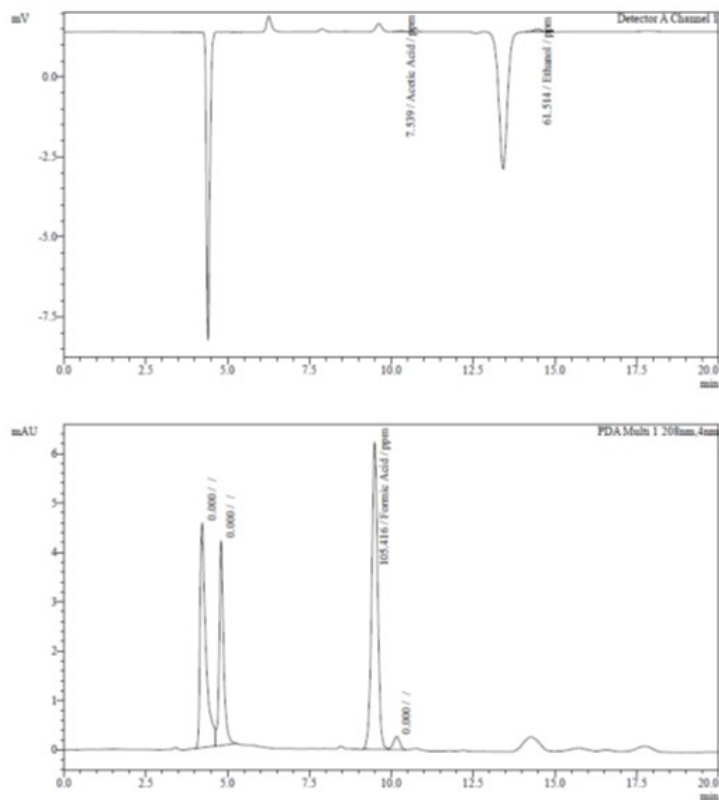

Figure S4: HPLC chromatograms obtained using a catalyst loading of  $1 \text{ mg.cm}^{-2}$  and a current density of  $-200 \text{ mA.cm}^{-2}$

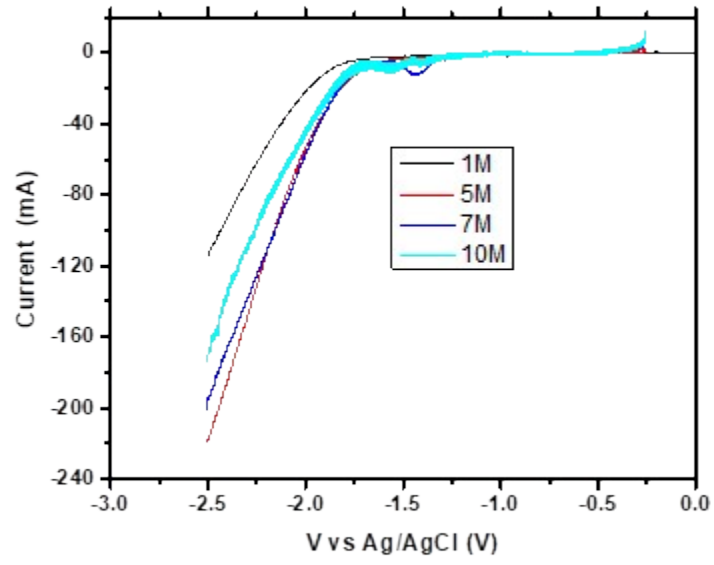

Figure S5: Linear sweep voltammetry curves at different KOH concentrations at 30 mV.s<sup>-1</sup>

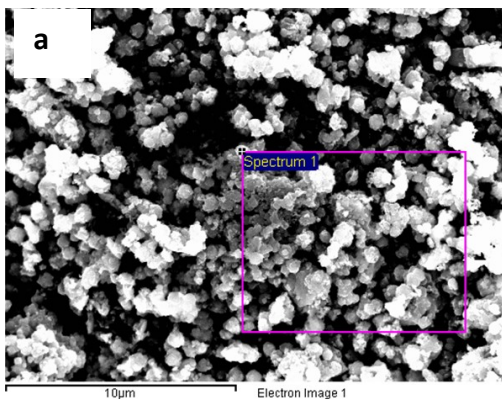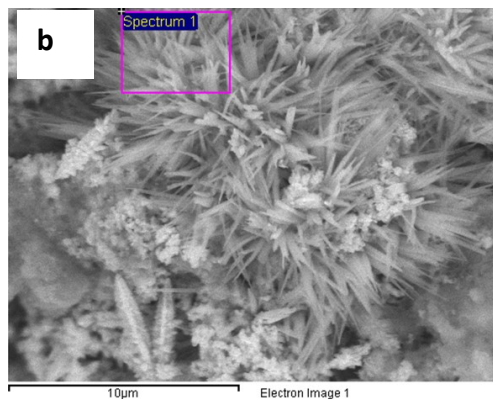

| Element | Weight% | Atomic% |
|---------|---------|---------|
| N       | 4.50    | 12.41   |
| O       | 6.62    | 15.97   |
| S       | 29.57   | 35.59   |
| Cu      | 59.31   | 36.03   |
| Totals  | 100.00  |         |

| Element | Weight% | Atomic% |
|---------|---------|---------|
| O       | 32.32   | 58.80   |
| F       | 4.27    | 6.54    |
| Si      | 0.38    | 0.40    |
| P       | 0.43    | 0.40    |
| K       | 18.13   | 13.49   |
| Cu      | 44.47   | 20.37   |
| Totals  | 100.00  |         |

Figure S6: Scanning electron microscopy images with energy dispersive spectroscopy of a) unflooded and b) flooded GDE in 1M KOH.

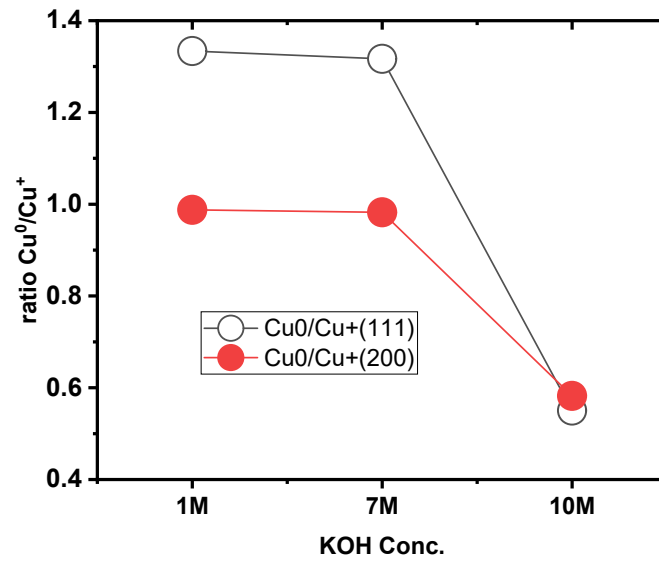

Figure S7:  $\text{Cu}^0/\text{Cu}^+$  ratio after  $\text{CO}_2\text{ER}$  in a flow-cell electrolyzer with different concentrations of KOH electrolyte.

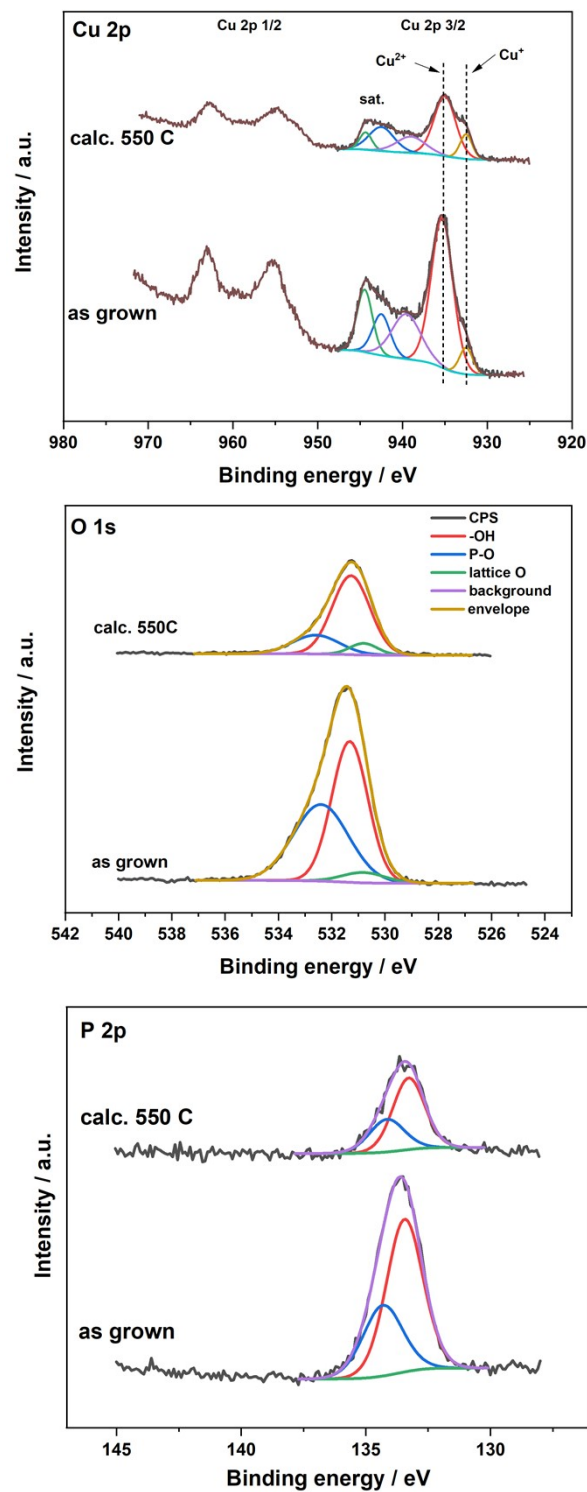

Figure S8: XPS of as-grown and annealed copper phosphate.

Table S1: Comparison of electroreduction performance of phosphate-based copper catalysts with our work

| Electrocatalysts                                           | Electrolyte            | Cell configuration | FE for major products                                   | Current (mA cm <sup>-2</sup> ) | Ref              |
|------------------------------------------------------------|------------------------|--------------------|---------------------------------------------------------|--------------------------------|------------------|
| Phosphate modified 3D Cu                                   | MeCN                   | H-cell             | 81% HCOOH (-1.45V vs. NHE)                              | ~1.5                           | 1                |
| Polycrystalline Cu <sub>3</sub> P                          | 0.1M KHCO <sub>3</sub> |                    | 0.9 HCOOH (-0.1 V vs. RHE))                             | <0.02                          | 2                |
| Cu <sub>3</sub> (PO <sub>4</sub> ) <sub>2</sub> nanosheets | 0.1M KHCO <sub>3</sub> | H-cell             | 67% C <sub>2</sub> H <sub>4</sub> (-1.48V vs RHE)       | -22.3                          | 3                |
| Cu <sub>2</sub> (PO <sub>4</sub> )(OH)                     | 1M KOH                 | Flow-cell          | ~40% C <sub>2</sub> H <sub>4</sub> (-1.377V vs. RHE)    | 112                            | 4                |
| Cu <sub>2</sub> P <sub>2</sub> O <sub>7</sub>              | 0.1M KOH               | MEA                | 39.8% C <sub>2</sub> H <sub>4</sub> (3.4V cell voltage) | 139.3                          | 5                |
| Phosphate-derived CuO <sub>x</sub> /C                      | 0.1M KHCO <sub>3</sub> | H-cell             | ~30% C <sub>2</sub> H <sub>4</sub> (-1.3 V vs. RHE)     | ~8                             | 6                |
| Copper phosphate nanospheres                               | 1M KOH                 | Flow-cell          | 47% C <sub>2</sub> H <sub>4</sub> (-1.4 vs. RHE)        | 164.5e                         | 7                |
| Copper hydroxyphosphate                                    | 0.1M KHCO <sub>3</sub> | H-cell             | 37.4% C <sub>2</sub> H <sub>4</sub> (-1.6V vs. RHE)     | ~15                            | 8                |
| CuPO                                                       | 0.1M KHCO <sub>3</sub> | H-cell             | 69.7% C <sub>2</sub> H <sub>4</sub> (-1.45V vs RHE)     | -23                            | 9                |
|                                                            | 2M KOH                 | Flow-cell          | 52.8% C <sub>2</sub> H <sub>4</sub>                     | 184.8                          |                  |
| <b>Copper phosphate</b>                                    | <b>1M KOH</b>          | <b>Flow-cell</b>   | <b>35% C<sub>2</sub>H<sub>4</sub> (-1.07V vs RHE)</b>   | <b>52.5</b>                    | <b>This work</b> |
|                                                            | <b>7M KOH</b>          | <b>Flow-cell</b>   | <b>55% C<sub>2</sub>H<sub>4</sub> (-0.97V vs RHE)</b>   | <b>80</b>                      |                  |

- Jian Zhao, Libo Sun, Silvia Canepa, Hongyu Sun, Murat Nulati Yesibolati, Matthew Sherburne, Rong Xu, Thirumany Sritharan, Joachim S. C. Loo, Joel W. Ager III, James Barber, Kristian Mølhave and Z. J. Xu, *J. Mater. Chem. A*, 2017, **5**, 11905 -11916.
- Anders B. Laursen, Karin U.D. Calvino, Timothy A. Goetjen, Kyra M.K. Yap, Shinjae Hwang, Hongbin Yang, Eric Garfunkel and G. C. Dismukes, *Electrochimica Acta* 2021, **391**, 138889.
- B. Zhang, J. Zhang, P. An, Z. Su, Q. Wan, X. Tan and L. Zheng, *Nano Energy*, 2021, **88**.
- Ying Zhang, Yunliang Liu, Qing Yu, Qiankang Zhang, Zhanbo Si, Haitao Li and H. Xu, *AIChE J.*, 2023, **69**, 18233.
- Jiaqi Sang, Pengfei Wei, Tianfu Liu, Houfu Lv, Xingming Ni, Dunfeng Gao, Jiangwei Zhang, Hefei Li, Yipeng Zang, Fan Yang, Zhi Liu, Guoxiong Wang and X. Bao, *Angew. Chem. Int. Ed.*, 2022, **61**, 202114238.
- Tengfei Gao, Yongzheng Gu, Minfang Wu, Yongping Liu, Long Yang, Tao Han, Shuai Zhang, Shoujie Li, Wei Wei, Wei Chen and X. Dong, *Energy Fuels*, 2023, **37**, 19053–19062.
- Li Zhang, Yong Men, Bin Wu, Yuanfen Feng, Chao Song, Shuang Liu, Jinguo Wang, Wei An and T. T. Magkoev, *Topics in Catalysis*, 2023, **66**, 1527–1538.
- Zhaojie Wang, Yizhu Shang, Hongyu Chen, Shoufu Cao, Qiuying Zhu, Siyuan Liu, Shuxian Wei and X. Lu, *Journal of Solid State Electrochemistry*, 2023, **27**, 1279–1287.



9. Xin Yu Zhang, Zhen Xin Lou, Jiacheng Chen, Yuanwei Liu, Xuefeng Wu, Jia Yue Zhao, Hai Yang Yuan, Minghui Zhu, Sheng Dai, Hai Feng Wang, Chenghua Sun, Peng Fei Liu and H. Yang, *Nature Communications*, 2023, **14**, 7681.
